# Supplementary material for: Systematic Design of Trypsin Cleavage Site Mutated Exendin4-Cysteine 1, an Orally Bioavailable Glucagon-Like Peptide-1 Receptor Agonist
Source: MDPI journal article supplement (doi:10.3390/ijms18030578), 2017-03-08
Supplement: s1 [file s1]

# Systematic Design of Trypsin Cleavage Site Mutated Exendin4-Cysteine 1, an Orally Bioavailable Glucagon-Like Peptide-1 Receptor Agonist

Wenbo Sai, Hong Tian, Kangmin Yang, Daoqi Tang, Jinxiao Bao, Yang Ge, Xiaoda Song, Yu Zhang, Cheng Luo, Xiangdong Gao and Wenbing Yao

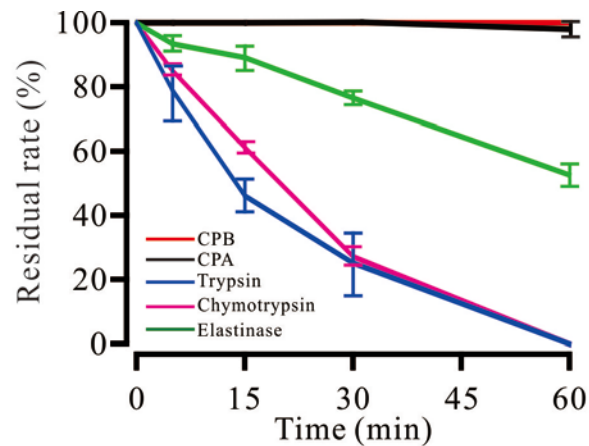

**Figure S1.** HPLC was used to confirm the key proteases for Ex4C in the small intestine. The residual rates of Ex4C treated by trypsin, chymotrypsin and elastase in 60-min were much lower than the value of CPA and CPB. The result was consistent with the BLI assay.
